# Supplementary material
Source: PubMed Central journal article supplement (PMC6450702)
Supplement: NIHMS1520562-supplement-216_2019_1632_MOESM1_ESM.pdf [file NIHMS1520562-supplement-216_2019_1632_MOESM1_ESM.pdf]

## **Analytical and Bioanalytical Chemistry**

### **Electronic Supplementary Material**

#### **Rapid determination of isocitrate dehydrogenase mutation status of human gliomas by extraction nanoelectrospray using a miniature mass spectrometer**

Fan Pu, Clint M. Alfaro, Valentina Pirro, Zhuoer Xie, Zheng Ouyang, R. Graham Cooks

## Materials

2-Hydroxyglutarate (2-HG), glutamic acid (GLU), acetonitrile and Whatman 1 filter paper were purchased from Sigma-Aldrich (St. Louis, MO). Ultrapure water was obtained from a Milli-Q system (Bedford, MA). Disposable sterile acupuncture needles (0.3 mm x 40 mm) were purchased from Zhongyan Taihe (Beijing, China).

## Fabrication of Nanotips

Borosilicate glass capillaries (o.d. 1.5mm, i.d. 0.86 mm, without filament) were purchased from Sutter Instrument (Novato, CA). Borosilicate glass capillaries were pulled into 5  $\mu\text{m}$  tips using a micropipette puller (Model P-97, Sutter Instrument).

## GLU and 2-HG Structures and Tandem MS Transitions

Table S1 Chemical structures and MS/MS transitions of GLU and 2-HG

|                                                 | GLU                                                                                | 2-HG                                                                                |
|-------------------------------------------------|------------------------------------------------------------------------------------|-------------------------------------------------------------------------------------|
| Chemical Structures                             | 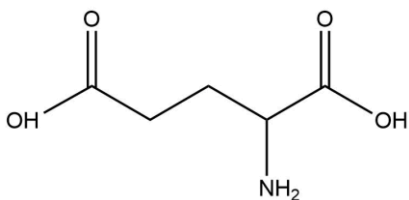 | 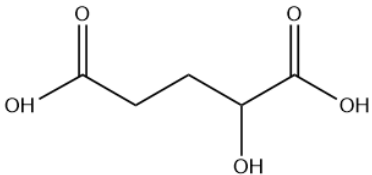 |
| <i>m/z</i> of precursor ions<br>(negative mode) | 146                                                                                | 147                                                                                 |
| <i>m/z</i> of product ions<br>(negative mode)   | 102, 128                                                                           | 129                                                                                 |

## MS/MS Product Ion Spectra of GLU and 2-HG

MS/MS product ion spectra of 10  $\mu\text{g/mL}$  GLU and 2-HG in methanol/water (9:1, v/v) solutions were recorded using nanoESI.

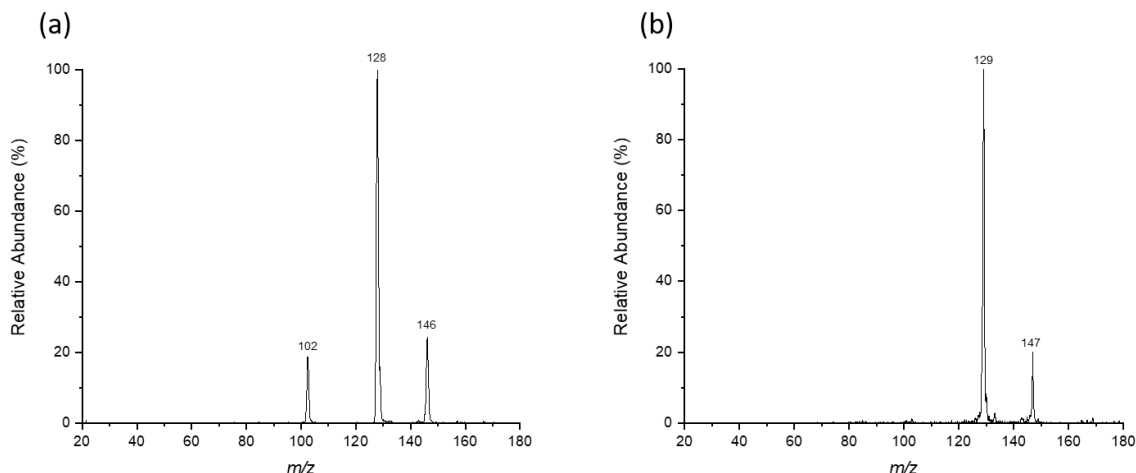

**Fig. S1** MS/MS product ion spectra recorded using Mini MS (a) GLU; (b) 2-HG

### Calculation of IDH Mutation Score

When calculating IDH mutation scores, the intensities of  $m/z$  129 was corrected for isotopic contribution from GLU, the following formula was used to calculate the IDH mutation score:

$$IDH\ Mutation\ Score = \frac{I_{129} - I_{128} \times 6.1\%}{I_{128}}$$

$I_{129}$  and  $I_{128}$  are absolute intensities of  $m/z$  129 and 128, respectively.

### Statistical Analysis and Software

In the box and whisker plots, boxes show median, lower, and upper quartiles, and whiskers are at minimum and maximum values.

Linear regressions were applied to establish correlations of 2HG concentration in IDH mutants and their corresponding IDH mutation scores.

t-Test of two-sample assuming unequal variances was performed on IDH mutant scores between IDH mutants and IDH wildtypes, two tail p-values were reported.

Microsoft Excel was used to perform linear regressions and t-Test. OriginPro 2018b was used to plot all spectra and box and whisker plots. ChemDraw Professional 16.0 was used to draw chemical structures.

### IDH Mutation Scores of Tissue Sections

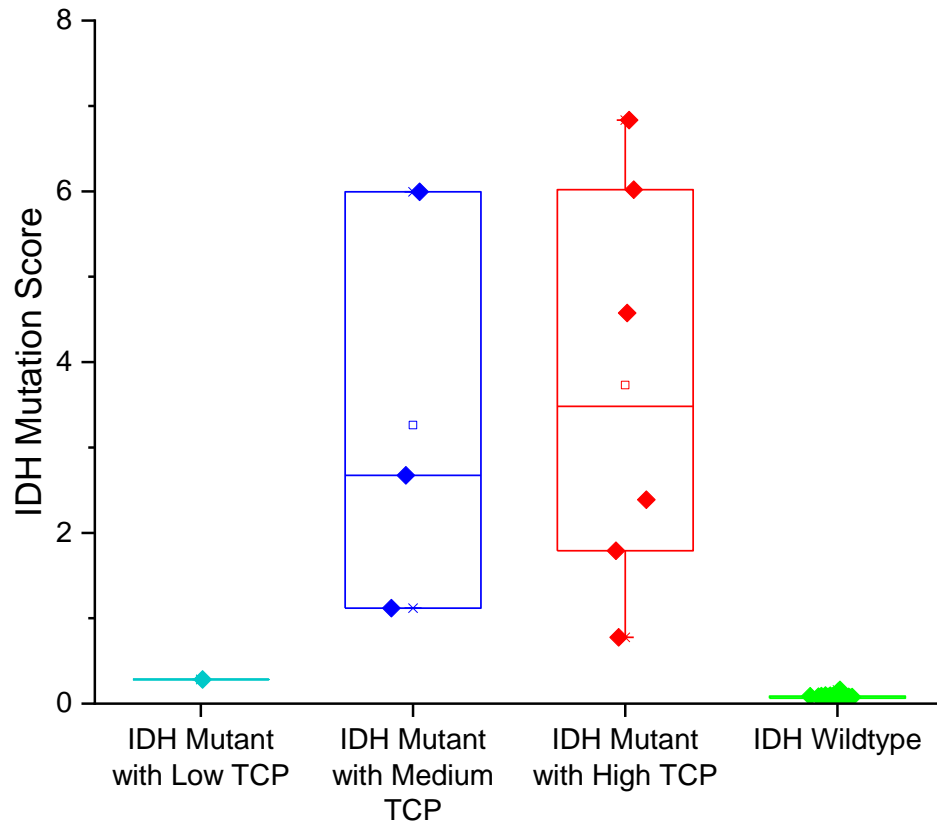

**Fig. S2** IDH mutation scores of tissue sections. 29 IDH wildtype, 10 IDH mutant (1 low TCP, 3 medium TCP and 6 high TCP)

**Table S2** IDH mutation scores of tissue sections

| Subject No. | Sample No. | IDH Mutation Score | IDH Mutation Status | TCP | Diagnosis |
|-------------|------------|--------------------|---------------------|-----|-----------|
| 1           | 1-S1       | 0.0634             | Wildtype            | Low | Normal    |
|             | 1-S2       | 0.0846             | Wildtype            | Low | Normal    |
| 2           | 2-S1       | 0.0909             | Wildtype            | Low | Normal    |

|           |       |        |          |        |                    |
|-----------|-------|--------|----------|--------|--------------------|
|           | 2-S2  | 0.0794 | Wildtype | Low    | Normal             |
| <b>3</b>  | 3-S1  | 0.0703 | Wildtype | Low    | Normal             |
| <b>4</b>  | 4-S1  | 0.0908 | Wildtype | Low    | Normal             |
| <b>5</b>  | 5-S1  | 0.0934 | Wildtype | Low    | Infiltrated margin |
| <b>6</b>  | 6-S1  | 0.0888 | Wildtype | Medium | Glioma             |
|           | 6-S2  | 0.0668 | Wildtype | Medium | Glioma             |
| <b>7</b>  | 7-S1  | 0.0852 | Wildtype | Low    | Normal             |
|           | 7-S2  | 0.0610 | Wildtype | Low    | Normal             |
| <b>8</b>  | 8-S1  | 0.0760 | Wildtype | Low    | Infiltrated margin |
| <b>9</b>  | 9-S1  | 0.0795 | Wildtype | Medium | Glioma             |
| <b>10</b> | 10-S1 | 0.0618 | Wildtype | Low    | Infiltrated margin |
|           | 10-S2 | 0.0810 | Wildtype | Low    | Infiltrated margin |
| <b>11</b> | 11-S1 | 0.1370 | Wildtype | High   | Glioma             |
| <b>12</b> | 12-S1 | 0.0512 | Wildtype | Low    | Infiltrated margin |
|           | 12-S2 | 0.0525 | Wildtype | Low    | Infiltrated margin |
|           | 12-S3 | 0.0868 | Wildtype | Low    | Infiltrated margin |
| <b>13</b> | 13-S1 | 0.0953 | Wildtype | High   | Glioma             |
| <b>14</b> | 14-S1 | 0.0810 | Wildtype | Medium | Glioma             |
| <b>15</b> | 15-S1 | 0.1609 | Wildtype | High   | Glioma             |
| <b>16</b> | 16-S1 | 0.0506 | Wildtype | Low    | Normal             |
| <b>17</b> | 17-S1 | 0.0387 | Wildtype | Low    | Infiltrated margin |
| <b>18</b> | 18-S1 | 0.0625 | Wildtype | Low    | Infiltrated margin |
| <b>19</b> | 19-S1 | 0.0521 | Wildtype | Medium | Normal             |
| <b>20</b> | 20-S1 | 0.0888 | Wildtype | Medium | Normal             |
| <b>21</b> | 21-S1 | 0.0686 | Wildtype | Low    | Normal             |
|           | 21-S2 | 0.0765 | Wildtype | Low    | Normal             |
| <b>22</b> | 22-S1 | 0.2822 | Mutant   | Low    | Glioma             |
| <b>23</b> | 23-S1 | 0.7763 | Mutant   | High   | Glioma             |
| <b>24</b> | 24-S1 | 1.1191 | Mutant   | Medium | Glioma             |
| <b>25</b> | 25-S1 | 1.7910 | Mutant   | High   | Glioma             |
| <b>26</b> | 26-S1 | 2.3883 | Mutant   | High   | Glioma             |
| <b>27</b> | 27-S1 | 2.6741 | Mutant   | Medium | Glioma             |
| <b>28</b> | 28-S1 | 4.5745 | Mutant   | High   | Glioma             |
|           | 28-S2 | 6.0185 | Mutant   | High   | Glioma             |
|           | 28-S3 | 6.8349 | Mutant   | High   | Glioma             |
| <b>29</b> | 29-S1 | 5.9937 | Mutant   | Medium | Glioma             |

### IDH Mutation Scores of Bulk Tissue Biopsies

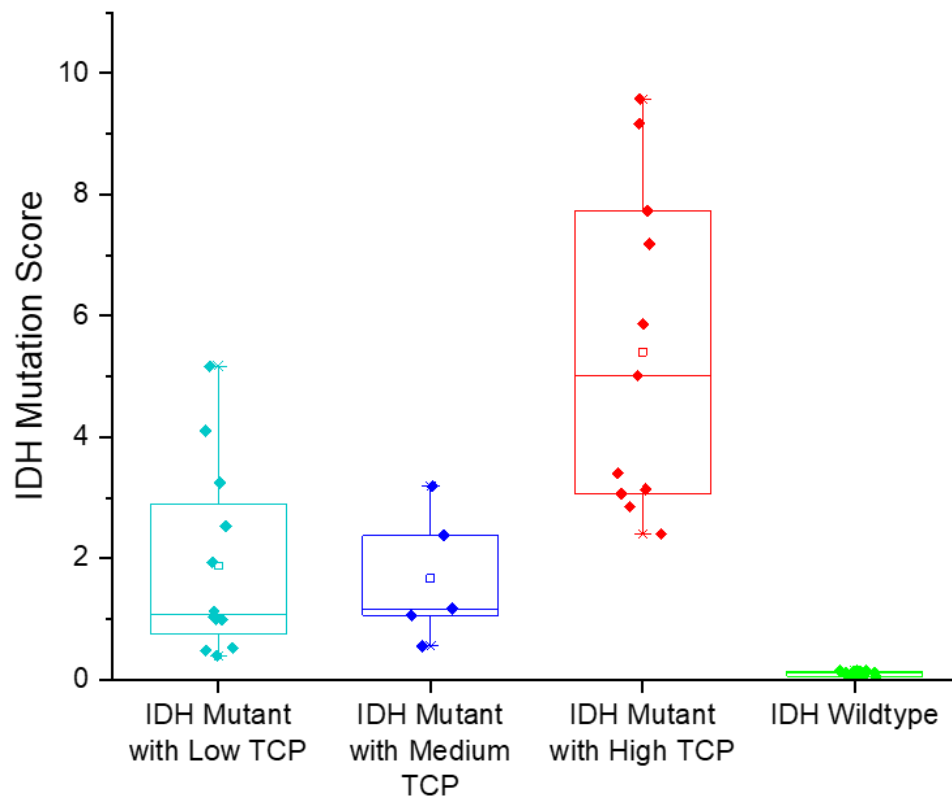

**Fig. S3** IDH mutation scores of tissue biopsies. 16 were IDH Wildtype, 28 were IDH mutant (12 low TCP, 5 medium TCP and 11 high TCP)

**Table S3** Reproducibility of extraction nESI using Mini MS, n=3

| Sample No. | IDH Mutation Score | IDH Mutation Status | RSD    |
|------------|--------------------|---------------------|--------|
| M1         | 11.5377            | Mutant              | 26.72% |
| M2         | 5.1516             | Mutant              | 27.05% |
| M3         | 2.6115             | Mutant              | 33.08% |
| W1         | 0.0699             | Wildtype            | 25.72% |
| W2         | 0.0656             | Wildtype            | 34.74% |
| W3         | 0.0689             | Wildtype            | 6.32%  |
| W4         | 0.0741             | Wildtype            | 33.70% |
| W5         | 0.0842             | Wildtype            | 23.53% |

**Table S4** IDH mutation scores of tissue biopsies

| Subject No. | Sample No. | IDH Mutation Score | IDH Mutation Status | TCP    | Glioma Diagnosis            |
|-------------|------------|--------------------|---------------------|--------|-----------------------------|
| <b>30</b>   | 30-B1      | 0.0811             | Wildtype            | Low    | Infiltrated white matter    |
|             | 30-B2      | 0.1190             | Wildtype            | High   | Glioma                      |
|             | 30-B3      | 0.1100             | Wildtype            | Low    | Infiltrated white matter    |
|             | 30-B4      | 0.1539             | Wildtype            | Low    | Infiltrated white matter    |
|             | 30-B5      | 0.1460             | Wildtype            | Low    | Infiltrated white matter    |
| <b>31</b>   | 31-B1      | 0.1394             | Wildtype            | High   | Glioma                      |
|             | 31-B2      | 0.0900             | Wildtype            | High   | Glioma                      |
|             | 31-B3      | 0.1012             | Wildtype            | High   | Glioma                      |
| <b>32</b>   | 32-B1      | 0.0376             | Wildtype            | Low    | Grey and white matter (80%) |
|             | 32-B2      | 0.0518             | Wildtype            | Low    | White matter                |
|             | 32-B3      | 0.1463             | Wildtype            | Low    | White matter                |
| <b>33</b>   | 33-B1      | 0.1166             | Wildtype            | High   | Glioma                      |
|             | 33-B2      | 0.0466             | Wildtype            | High   | Glioma                      |
|             | 33-B3      | 0.0659             | Wildtype            | Low    | Infiltrated white matter    |
| <b>34</b>   | 34-B1      | 0.1295             | Wildtype            | High   | Tumor                       |
| <b>35</b>   | 35-B1      | 0.0425             | Wildtype            | Low    | Infiltrated grey matter     |
| <b>36</b>   | 36-B1      | 3.1891             | Mutant              | Medium | Glioma                      |
|             | 36-B2      | 2.3792             | Mutant              | Medium | Glioma                      |
|             | 36-B3      | 3.2451             | Mutant              | Low    | Infiltrative margin         |
|             | 36-B4      | 0.9918             | Mutant              | Low    | Infiltrative margin         |
| <b>37</b>   | 37-B1      | 9.5765             | Mutant              | High   | Glioma                      |
|             | 37-B2      | 1.9356             | Mutant              | Low    | Infiltrated white matter    |
|             | 37-B3      | 1.1297             | Mutant              | Low    | Infiltrated white matter    |
|             | 37-B4      | 5.1713             | Mutant              | Low    | Infiltrated white matter    |
| <b>38</b>   | 38-B1      | 7.7310             | Mutant              | High   | Glioma                      |
|             | 38-B2      | 9.1739             | Mutant              | High   | Glioma                      |
| <b>39</b>   | 39-B1      | 0.9982             | Mutant              | Low    | White matter                |
|             | 39-B2      | 4.1080             | Mutant              | Low    | Glioma                      |
|             | 39-B3      | 0.5529             | Mutant              | Medium | Infiltrated margin          |
|             | 39-B4      | 1.0613             | Mutant              | Medium | Infiltrated white matter    |
| <b>40</b>   | 40-B1      | 1.0244             | Mutant              | Low    | Infiltrated white matter    |
|             | 40-B2      | 0.4832             | Mutant              | Low    | Infiltrated white matter    |
|             | 40-B3      | 0.5211             | Mutant              | Low    | Grey matter                 |
| <b>41</b>   | 41-B1      | 5.0162             | Mutant              | High   | Tumor                       |
|             | 41-B2      | 5.8643             | Mutant              | High   | Tumor                       |
|             | 41-B3      | 3.1335             | Mutant              | High   | Tumor                       |
|             | 41-B4      | 7.1849             | Mutant              | High   | Tumor                       |
|             | 41-B5      | 3.4018             | Mutant              | High   | Tumor                       |

|           |       |        |        |        |                     |
|-----------|-------|--------|--------|--------|---------------------|
| <b>42</b> | 42-B1 | 0.3971 | Mutant | Low    | Grey matter         |
|           | 42-B2 | 1.1677 | Mutant | Medium | Glioma              |
| <b>43</b> | 43-B1 | 2.8553 | Mutant | High   | Glioma              |
|           | 43-B2 | 2.4004 | Mutant | High   | Glioma              |
| <b>44</b> | 44-B1 | 3.0641 | Mutant | High   | Glioma              |
|           | 44-B2 | 2.5315 | Mutant | Low    | Infiltrative margin |

#### Typical MS/MS Spectra from Extraction Nano electrospray of Bulk Tissue Biopsies

Typical MS/MS spectra recorded from extraction nano electrospray of another four different bulk tissue biopsies are presented here, insets are enlarged views of the peaks of interests.

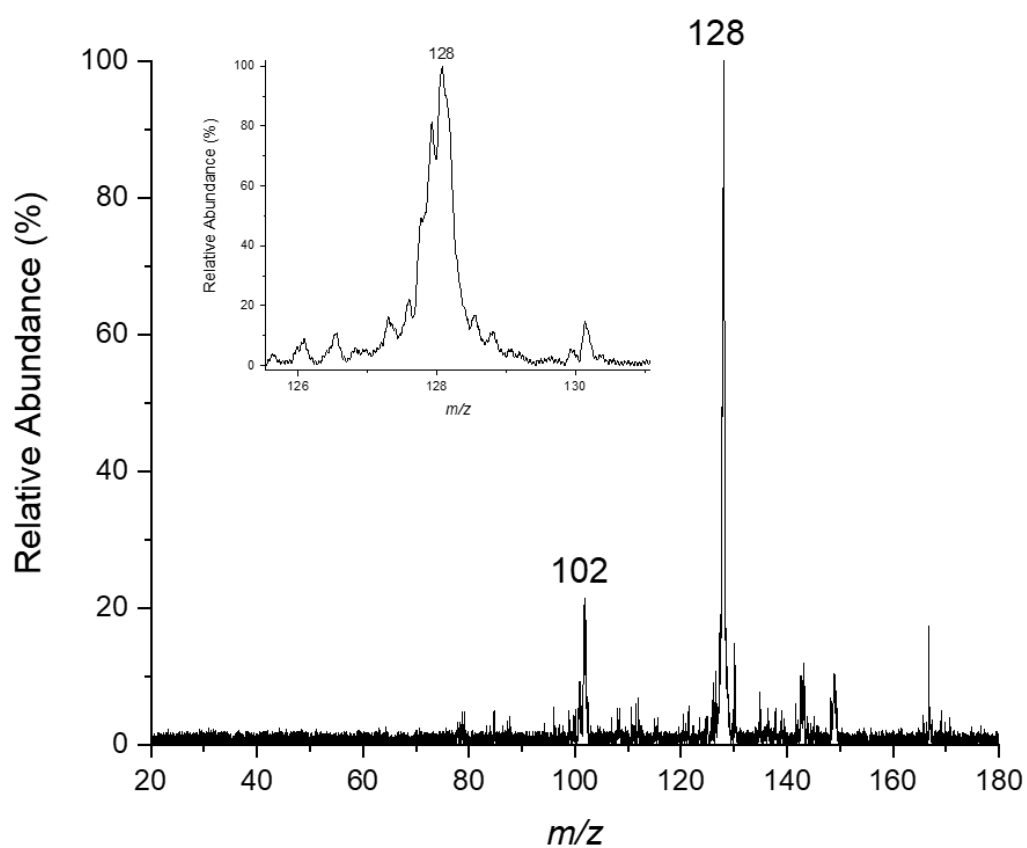

**Fig. S4** MS/MS spectra, IDH wildtype, low TCP

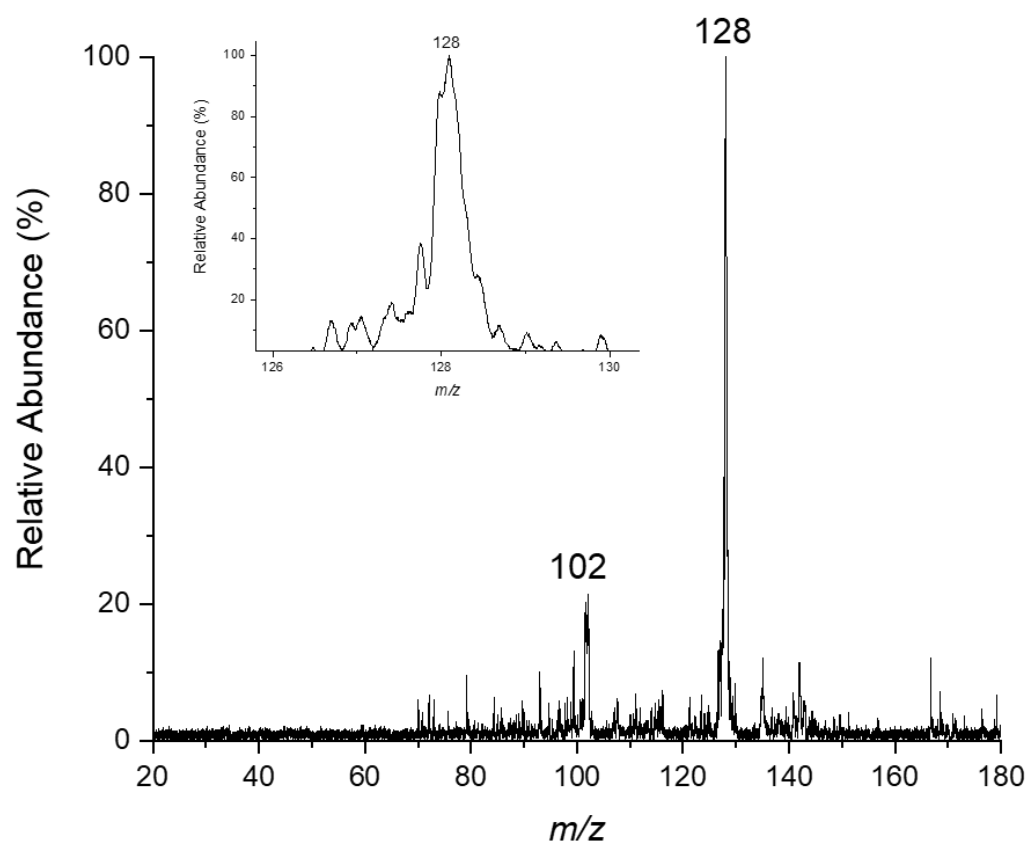

**Fig. S5** MS/MS spectra, IDH wildtype, high TCP

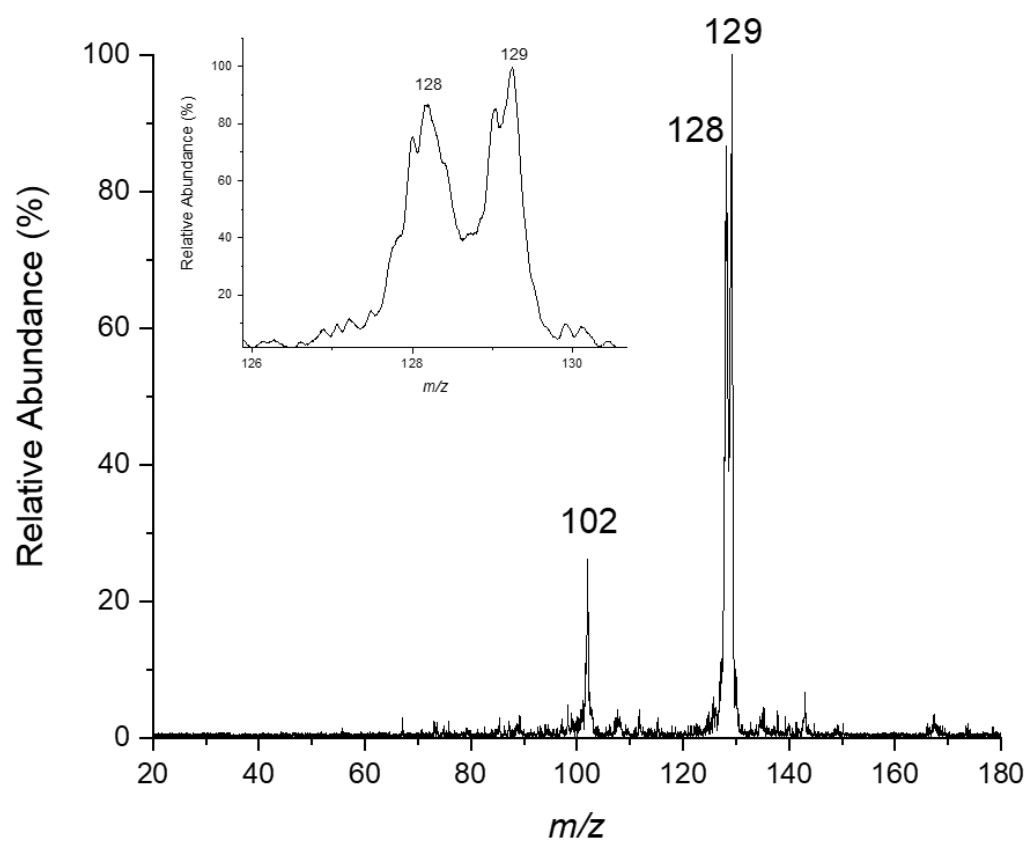

Fig. S6 MS/MS spectra, IDH mutant, low TCP

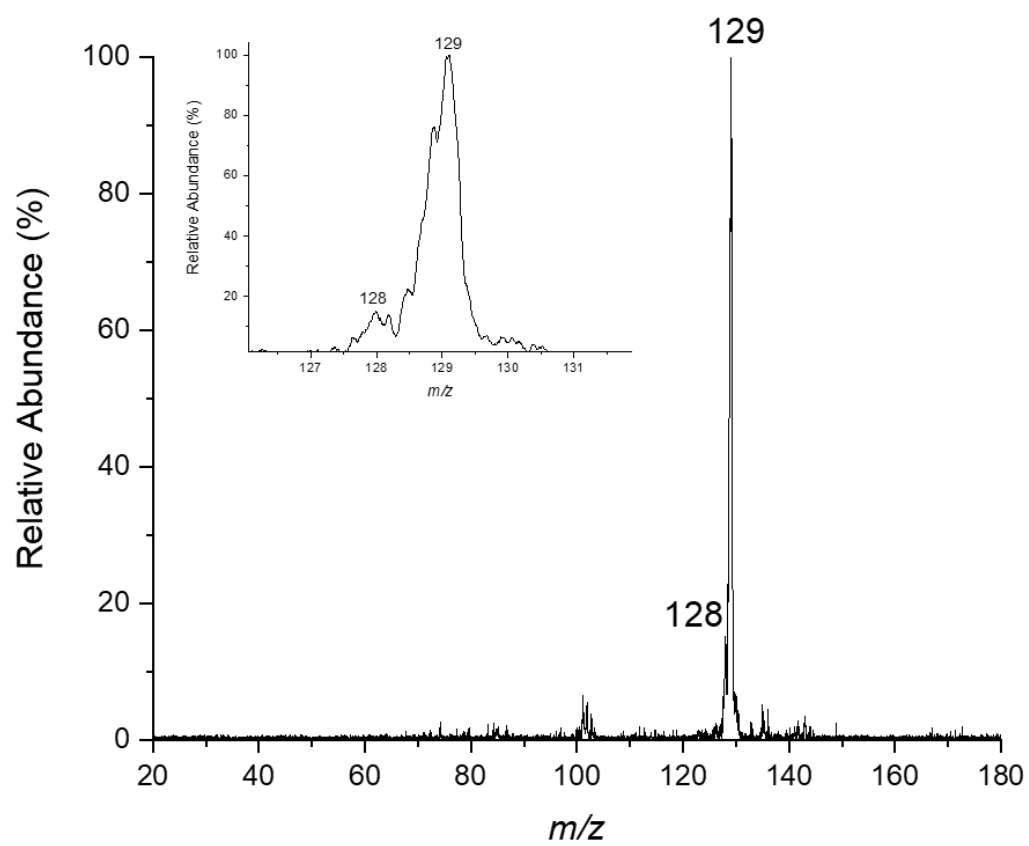

**Fig. S7** MS/MS spectra, IDH mutant, high TCP
